# Supplementary material for: Members of Prevotella Genus Distinctively Modulate Innate Immune and Barrier Functions in a Human Three-Dimensional Endometrial Epithelial Cell Model
Source: Oxford University Press journal article supplement (doi:10.1093/infdis/jiaa324), 2020-06-05
Supplement: jiaa324_suppl_supplementary_figure_1.docx [file jiaa324_suppl_supplementary_figure_1.docx]

**
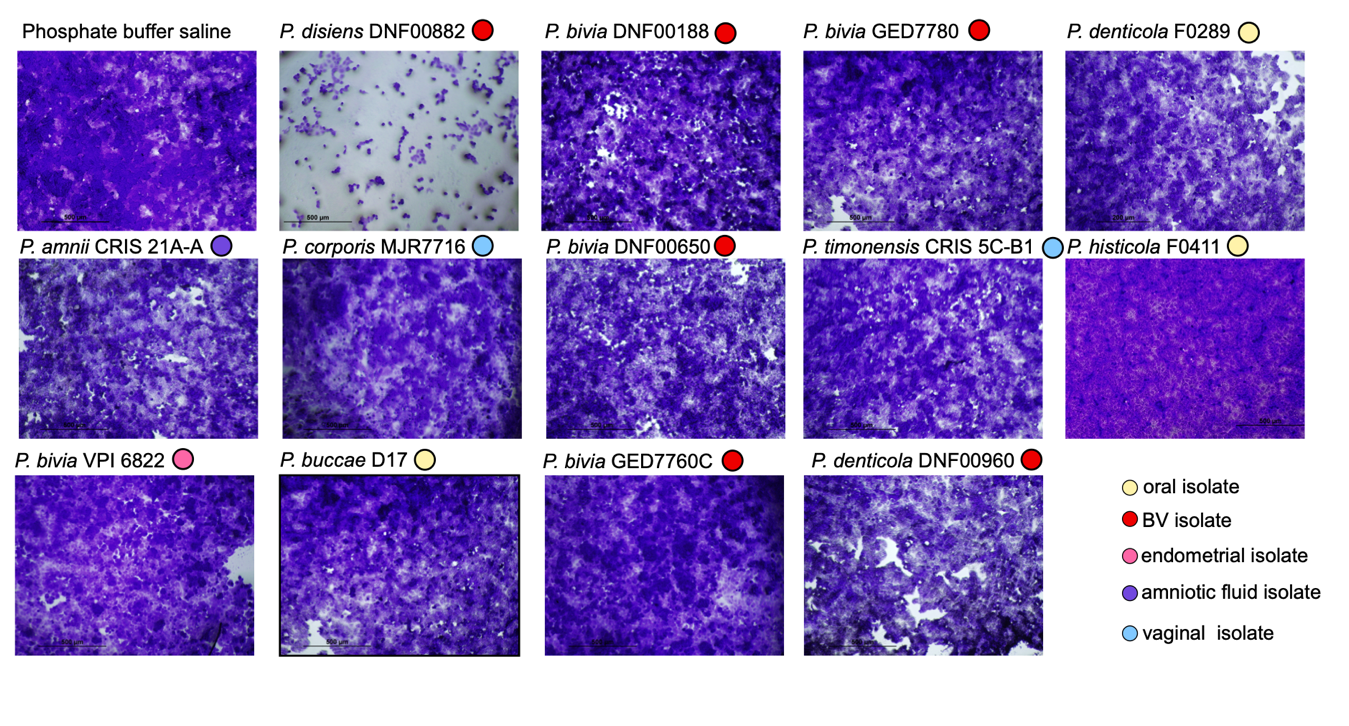
Supplementary Figure 1.** Crystal violet staining of the human endometrial epithelial cell monolayer.
