# Supplementary material for: Members of Prevotella Genus Distinctively Modulate Innate Immune and Barrier Functions in a Human Three-Dimensional Endometrial Epithelial Cell Model
Source: Oxford University Press journal article supplement (doi:10.1093/infdis/jiaa324), 2020-06-05
Supplement: jiaa324_suppl_supplementary_figure_2.docx [file jiaa324_suppl_supplementary_figure_2.docx]

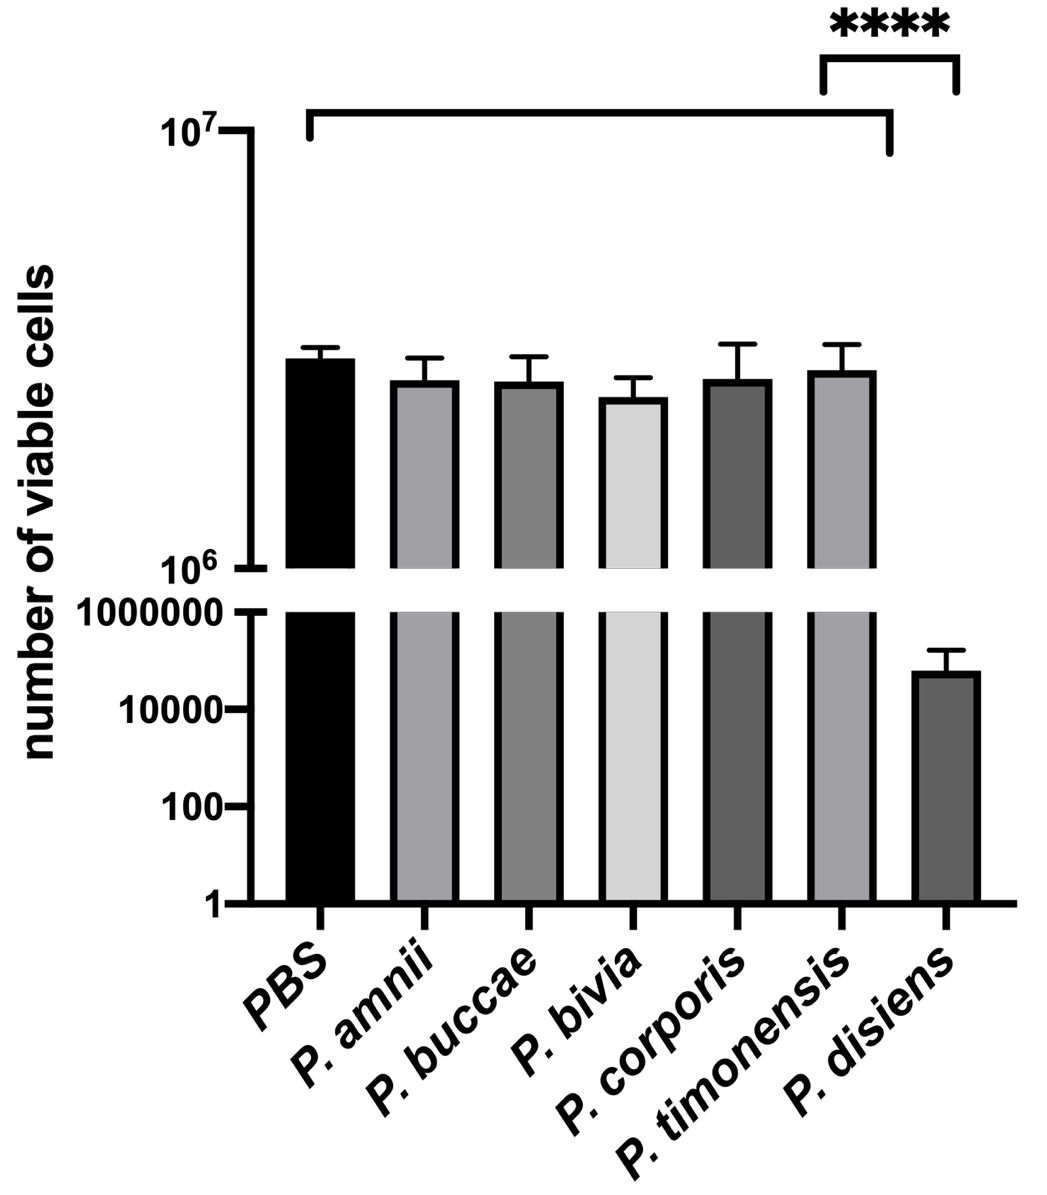


**Supplementary Figure 2. Number of viable EECs after treated with PBS or infected with selected *Prevotella* spp for 24 hours at MOI 10.** The viability calculations were based on trypan blue exclusion in comparison to the PBS control. Analysis of variance (ANOVA) with Tukey’s adjustment for multiple comparison was used to determine the differences in the means. An adjusted *p* value less than 0.05 was considered significant (*p*****<0.0001). The strain designations are as follows: *P. amnii* CRIS 21A-A, *P. buccae* D17, *P. bivia* VPI 6822, *P. corporis* MJR7716, *P. denticola* DNF00960, and *P. timonensis* CRIS 5C-B1.
