# Supplementary material for: Members of Prevotella Genus Distinctively Modulate Innate Immune and Barrier Functions in a Human Three-Dimensional Endometrial Epithelial Cell Model
Source: Oxford University Press journal article supplement (doi:10.1093/infdis/jiaa324), 2020-06-05
Supplement: jiaa324_suppl_supplementary_figure_3.docx [file jiaa324_suppl_supplementary_figure_3.docx]

**Supplementary Figure 3. Percentage (±SD) of colony forming units (CFUs) attached to the 3-D ECC model 24 hours after infection at a MOI of 10.** The number of viable bacteria was calculated from a minimum of three independent experiments.
