# Supplementary material for: Members of Prevotella Genus Distinctively Modulate Innate Immune and Barrier Functions in a Human Three-Dimensional Endometrial Epithelial Cell Model
Source: Oxford University Press journal article supplement (doi:10.1093/infdis/jiaa324), 2020-06-05
Supplement: jiaa324_suppl_supplementary_figure_4.docx [file jiaa324_suppl_supplementary_figure_4.docx]

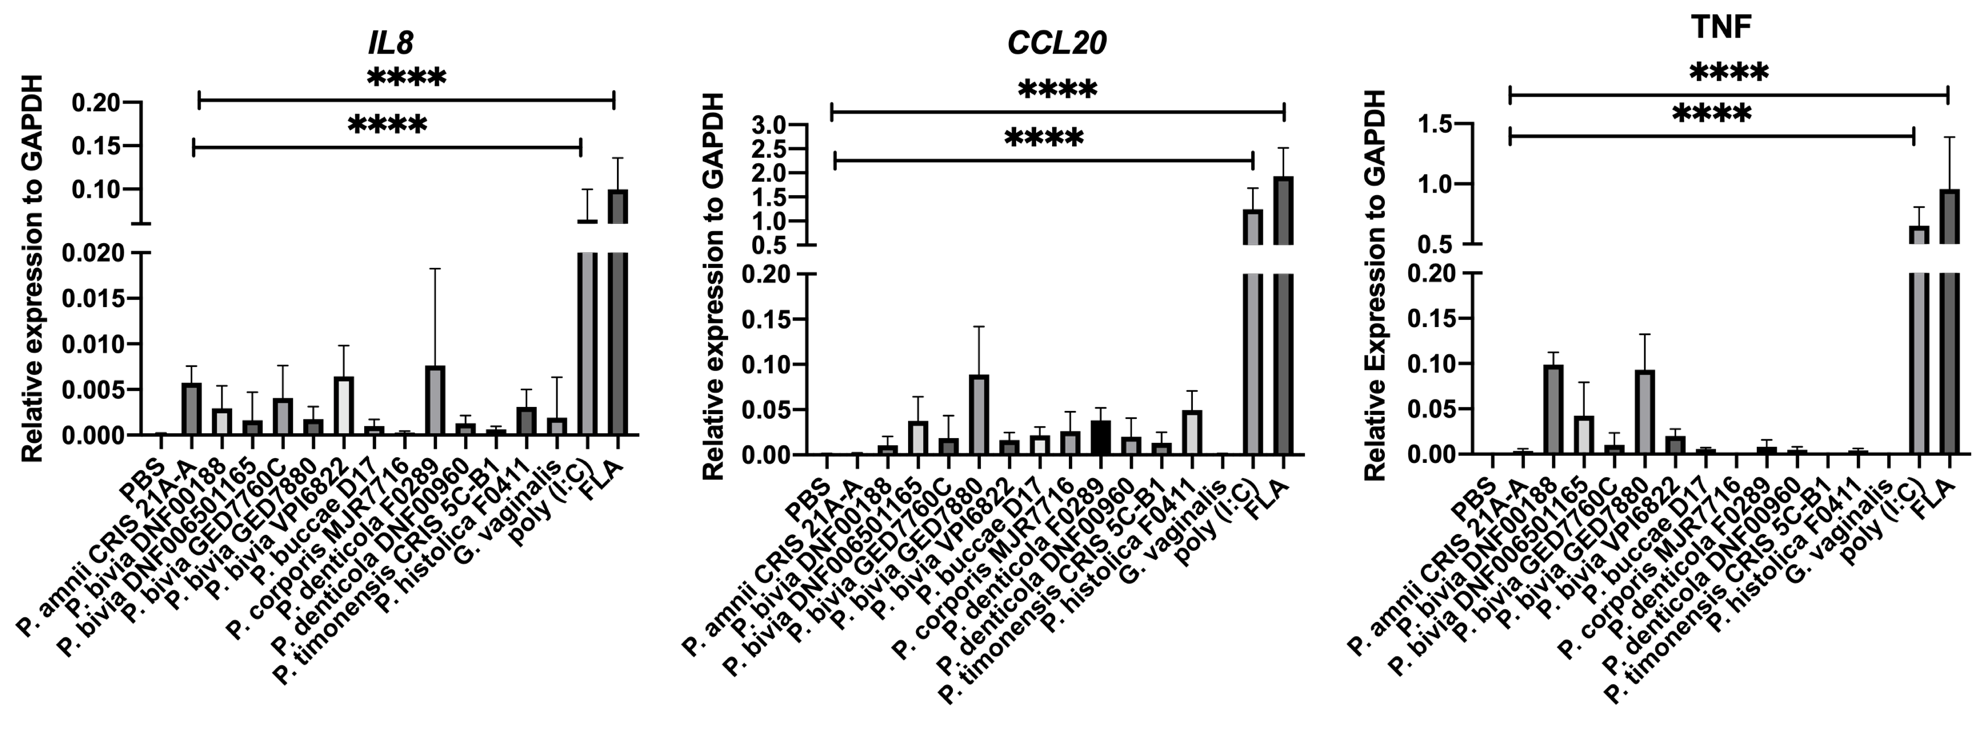


**Supplementary Figure 4. Expression of proinflammatory cyotkines in 3-D EEC model. 3**-D ECC model were infected with Prevotella spp, G. vaginalis, PBS, poly(I:C), and FLA fir 24 hours at a multiplicity of infection of 10 or treated with PBS, FLA, or poly (I:C). The gene expression levels were normalized to GAPDH. Data are representative of at least three independent experiments. ANOVA analysis with multiple comparisons was performed to measure statistical significance. **** p < 0.0001.
