# Supplementary material for: Members of Prevotella Genus Distinctively Modulate Innate Immune and Barrier Functions in a Human Three-Dimensional Endometrial Epithelial Cell Model
Source: Oxford University Press journal article supplement (doi:10.1093/infdis/jiaa324), 2020-06-05
Supplement: jiaa324_suppl_supplementary_table_1.docx [file jiaa324_suppl_supplementary_table_1.docx]

**Supplementary Table S1.** Primers used in the study.

| **Gene** | **Forward primer** | **Reverse primer** | **Ref** |
| --- | --- | --- | --- |
| *CCL20* | 5’-TTGCTCCTGGCTGCTTTG-3’ | 5’-ACCCTCCATGATGTGCAAG-3’ | [1,2] |
| *GAPDH* | 5’-TGCAGACCACAGTCCATGCCA-3’ | 5’-CCCTGTTGCTGTAGCCAAATT-3’ | [1,2] |
| *IL8* | ﻿5’-ATG ACTTCCAAGCTGGCCGTGGCT | ﻿5’-CAGCCAGTGTTGTGATTGCT-3’ | [2] |
| *MUC1* | 5’-TGCCTTGGCTGTCTGTCAGT-3’ | 5’-GTAGGTATCCCGGGCTGGAA-3’ | [1,2] |
| *MUC3* | 5’-CCTCATTGCAAACTTCACTC-3’ | 5’-AGCCCACATTTTCTGTACTG-3’ | [1,2] |
| *MUC4* | 5’-CAGCCTCTGCCAGCACCTCACCTG-3’ | 5’-GGAGGGGTTTGATGAAAACCTT GTCGTCTCTCC-3’ | [1,2] |
| *MUC20* | 5’-ATCCCGAGGAAGCCATCTTTGACA-3’ | 5’-TTCTGTGGAGGTGTGAGCCAA  TGT-3’ | [2] |
| *TNF* | ﻿5’-CTCAACCTCTTCTGGCTCAAA | 5’GTCAGGGATCAAAGCTGTAGG-3’ | [1,2] |

**Supplementary References**

1. Doerflinger SY, Throop AL, Herbst-Kralovetz MM. Bacteria in the vaginal microbiome alter the innate immune response and barrier properties of the human vaginal epithelia in a species-specific manner. J Infect Dis. **2014**; 209(12):1989–1999.

2. Laniewski P, Gomez A, Hire G, So M, Herbst-Kralovetz MM. Human three-dimensional endometrial epithelial cell model to study host interactions with vaginal bacteria and Neisseria gonorrhoeae. Infect Immun. **2017**; 85(3):1–15.
