# Supplementary material for: Members of Prevotella Genus Distinctively Modulate Innate Immune and Barrier Functions in a Human Three-Dimensional Endometrial Epithelial Cell Model
Source: Oxford University Press journal article supplement (doi:10.1093/infdis/jiaa324), 2020-06-05
Supplement: jiaa324_suppl_supplementary_table_3.docx [file jiaa324_suppl_supplementary_table_3.docx]

| **Supplementary Table 2. Presence or absence of enzymes in *Prevotella* isolates based on genome predictions.** | | | |
| --- | --- | --- | --- |
| **Strain** | **Class** | **Enzyme** | **Reaction** |
| *P. timonensis* CRIS 21A-A | hydrolyses | acyloxyacyl hydrolase | [a 3-(acyloxy)acyl group of bacterial toxin + H2O → a 3-hydroxyacyl group of bacterial toxin + a fatty acid + H+](https://biocyc.org/GCF_000177055-HMP/NEW-IMAGE?type=REACTION&object=3.1.1.77-RXN) |
| *P. timonensis* CRIS 21A-A | hydrolyses | alpha-N-acetylglucosaminidase | [an N-acetyl-α-D-glucosaminide + H2O →  N-acetyl-α-D-glucosamine + a non glycosylated sugar acceptor](https://biocyc.org/GCF_000177055-HMP/NEW-IMAGE?type=REACTION&object=3.2.1.50-RXN) |
| *P. timonensis* CRIS 21A-A | hydrolyses | alkaline protease | [a protein + H2O → a peptide + a peptide](https://biocyc.org/GCF_000177055-HMP/NEW-IMAGE?type=REACTION&object=3.4.25.1-RXN) |
| *P. timonensis* CRIS 21A-A + *P. denticola* | isomerases | N-acetylglucosoamine 2-epimerase | [an N-acyl-D-glucosamine ↔ an N-acyl-D-mannosamine](https://biocyc.org/GCF_000759205-HMP/NEW-IMAGE?type=REACTION&object=N-ACYLGLUCOSAMINE-2-EPIMERASE-RXN) |
| *P. timonensis* CRIS 21A-A + *P. denticola* | isomerases | N-acetylglucosoamine 2-epimerase | [N-acetyl-β-D-mannosamine ↔  N-acetyl-β-D-glucosamine](https://biocyc.org/GCF_000759205-HMP/NEW-IMAGE?type=REACTION&object=R381-RXN) |
| *P. timonensis* CRIS 21A-A + *P. denticola* | isomerases | N-acetylglucosoamine 2-epimerase | [N-acetyl-D-mannosamine ↔  N-acetyl-D-glucosamine](https://biocyc.org/GCF_000759205-HMP/NEW-IMAGE?type=REACTION&object=RXN-16006) |
| *P. disiens* DNF00882 | hydrolyses | D,D-heptose 1,7-biphosphate phosphatase | [D-glycero-β-D-manno-heptose 1,7-bisphosphate + H2O → D-glycero-β-D-manno-heptose 1-phosphate + phosphate](https://biocyc.org/GCF_000759225-HMP/NEW-IMAGE?type=REACTION&object=RXN0-4361) |
| *P. disiens* DNF00882 | hydrolyses | a carboxypeptidase | [a peptide with a penultimate glycine + H2O → a peptide with a C-terminal glycine + an amino acid](https://biocyc.org/GCF_000759225-HMP/NEW-IMAGE?type=REACTION&object=GLY-X-CARBOXYPEPTIDASE-RXN) |
| *P. disiens* DNF00882 | oxidoreductases | NAD/NADP octopine/nopaline dehydrogenase | [D-nopaline + NADP+ + H2O = L-arginine + 2-oxoglutarate + NADPH + H+](https://biocyc.org/GCF_000759225-HMP/NEW-IMAGE?type=REACTION&object=1.5.1.19-RXN) |
| *P. disiens* DNF00882 | isomerases | phosphoheptose isomerase | [D-sedoheptulose 7-phosphate = D-glycero-D-manno-heptose 7-phosphate](https://biocyc.org/GCF_000759225-HMP/NEW-IMAGE?type=REACTION&object=RXN0-4301) |
| *P. disiens* DNF00882 | ligases | ADP-forming succinate--CoA ligase subunit beta | [succinate + ATP + coenzyme A ↔ succinyl-CoA + ADP + phosphate](https://biocyc.org/GCF_000759225-HMP/NEW-IMAGE?type=REACTION&object=SUCCCOASYN-RXN) |
| *P. bivia* strains | transferases | citrate lyase holo-[acyl-carrier protein] synthase | [2'-(5''-triphospho-α-D-ribosyl)-3'-dephospho-CoA + an apo [citrate-lyase acyl-carrier protein] → a holo [citrate lyase acyl-carrier protein] + diphosphate + H+](https://biocyc.org/GCF_000759045-HMP/NEW-IMAGE?type=REACTION&object=2.7.7.61-RXN) |
| *P. bivia* strains | transferases/ligases | [citrate (pro-3S)-lyase] ligase | [3'-dephospho-CoA + ATP + H+ → 2'-(5''-triphospho-α-D-ribosyl)-3'-dephospho-CoA + adenine](https://biocyc.org/GCF_000759045-HMP/NEW-IMAGE?type=REACTION&object=2.7.8.25-RXN) |
| *P. bivia* strains | transferases/ligases | [citrate (pro-3S)-lyase] ligase | [a holo [citrate lyase acyl-carrier protein] + acetate + ATP → an acetyl-holo [citrate lyase acyl-carrier protein] + AMP + diphosphate](https://biocyc.org/GCF_000759045-HMP/NEW-IMAGE?type=REACTION&object=CITC-RXN) |
| *P. bivia* strains | transferases | aminoglycoside phosphotransferase | [a kanamycin + ATP → a kanamycin 3'-phosphate + ADP + H+](https://biocyc.org/GCF_000759045-HMP/NEW-IMAGE?type=REACTION&object=KANAMYCIN-KINASE-RXN) |
| *P. bivia* strains | transferases | citrate degradation enzymes | citrate + an acetyl-*holo* [citrate lyase acyl-carrier protein] + H+ → a citryl-*holo* [citrate lyase acyl-carrier protein] + acetate |
